# Supplementary material
Source: PubMed Central journal article supplement (PMC10463169)
Supplement: jamaneurol-e232893-s001.pdf [file jamaneurol-e232893-s001.pdf]

## Data Sharing Statement

Howard. Trends in Suicide Rates Among Post-9/11 US Military Veterans With and Without Traumatic Brain Injury From 2006-2020. *JAMA Neurol.* Published August 28, 2023.  
doi:10.1001/jamaneurol.2023.2893

### Data

**Data available:** No

### Additional Information

**Explanation for why data not available:** The original data used for this analysis are confidential and proprietary to the US Department of Defense and Veterans Affairs.
